# Supplementary material for: Balloon-borne measurements of temperature, water vapor, ozone and aerosol backscatter on the southern slopes of the Himalayas during StratoClim 2016–2017
Source: Copernicus journal article supplement (doi:10.5194/acp-18-15937-2018), 2018-11-07
Supplement: Supplementary file [file acp-18-15937-2018-supplement-title-page.pdf › acp-18-15937-2018-supplement-title-page.pdf]

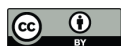

*Supplement of*

**Balloon-borne measurements of temperature, water vapor, ozone  
and aerosol backscatter on the southern slopes of the Himalayas  
during StratoClim 2016–2017**

**Simone Brunamonti et al.**

*Correspondence to:* Simone Brunamonti ([simone.brunamonti@env.ethz.ch](mailto:simone.brunamonti@env.ethz.ch))

- [acp-18-15937-2018-supplement-title-page.pdf](#)
- [Brunamontietal\\_Supplementary\\_NoTitle.docx](#)

The copyright of individual parts of the supplement might differ from the CC BY 4.0 License.
